# Supplementary material for: Permeability Assessment of a High-Throughput Mucosal Platform
Source: Pharmaceutics. 2023 Jan 22;15(2):380. doi: 10.3390/pharmaceutics15020380 (PMC9966667; doi:10.3390/pharmaceutics15020380)
Supplement: Supplementary file 1 [file pharmaceutics-15-00380-s001.zip › pharmaceutics-2134898-supplementary.pdf]

## Supporting Information

# Permeability Assessment of a High-Throughput Mucosal Platform

Cosmin Butnarasu <sup>1</sup>, Olga Valentina Garbero <sup>1</sup>, Paola Petrini <sup>2</sup>, Livia Visai <sup>3,4</sup> and Sonja Visentin <sup>1,\*</sup>

<sup>1</sup> Department of Molecular Biotechnology and Health Science, University of Turin, via Quarello 15, 10135 Torino, Italy

<sup>2</sup> Department of Chemistry, Materials and Chemical Engineering “Giulio Natta”, Politecnico di Milano, Milan 20133, Italy

<sup>3</sup> Molecular Medicine Department (DMM), Centre for Health Technologies (CHT), UdR INSTM, University of Pavia, 27100 Pavia, Italy

<sup>4</sup> Medicina Clinica-Specialistica, UOR5 Laboratorio di Nanotecnologie, ICS Maugeri, IRCCS, 27100 Pavia, Italy

\* Correspondence: sonja.visentin@unito.it; Tel.: +39-0116708337

## List of contents

### Supplementary Figures

Figure S1: structures of the 35 investigated drugs.

Figure S2: principal components analysis.

Figure S3: 2D plots of the logarithm of apparent permeability ( $P_{app}$ ) versus (a) globularity, (b) intrinsic solubility (cLogS), (c) molecular weight (MW), and (d) the Van der Waals Surface (VDW Surface).

Figure S4: 3D plot depicting the chemical space of the dataset defined by cLogS, MW, and VDW Surface using a binary or a ternary classification system.

Figure S5: comparison of the apparent permeability measured without and with mucus.

### Supplementary Table

Table S1: molecular descriptors dataset.

Table S2: HPLC-ESI-MS analytical conditions of the investigated drugs.

Table S3: Compliance of the dataset to Lipinski's rule of 5 (Ro5). The partition coefficient (cLogP) is the average of cLogP calculated with MarvinSketch, ADMETLab 2.0, and DataWarrior.

Table S4: Compliance of the dataset to Veber's rule.

Table S5: Molecular descriptors that have the strongest correlation coefficient (Bravais-Pearson) with the apparent permeability ( $P_{app}$ ).

Table S6: Molecular descriptors that have the strongest correlation coefficient (Bravais-Pearson) with the apparent permeability ( $P_{app}$ ) measured in the presence of mucus.

## Supplementary Figures

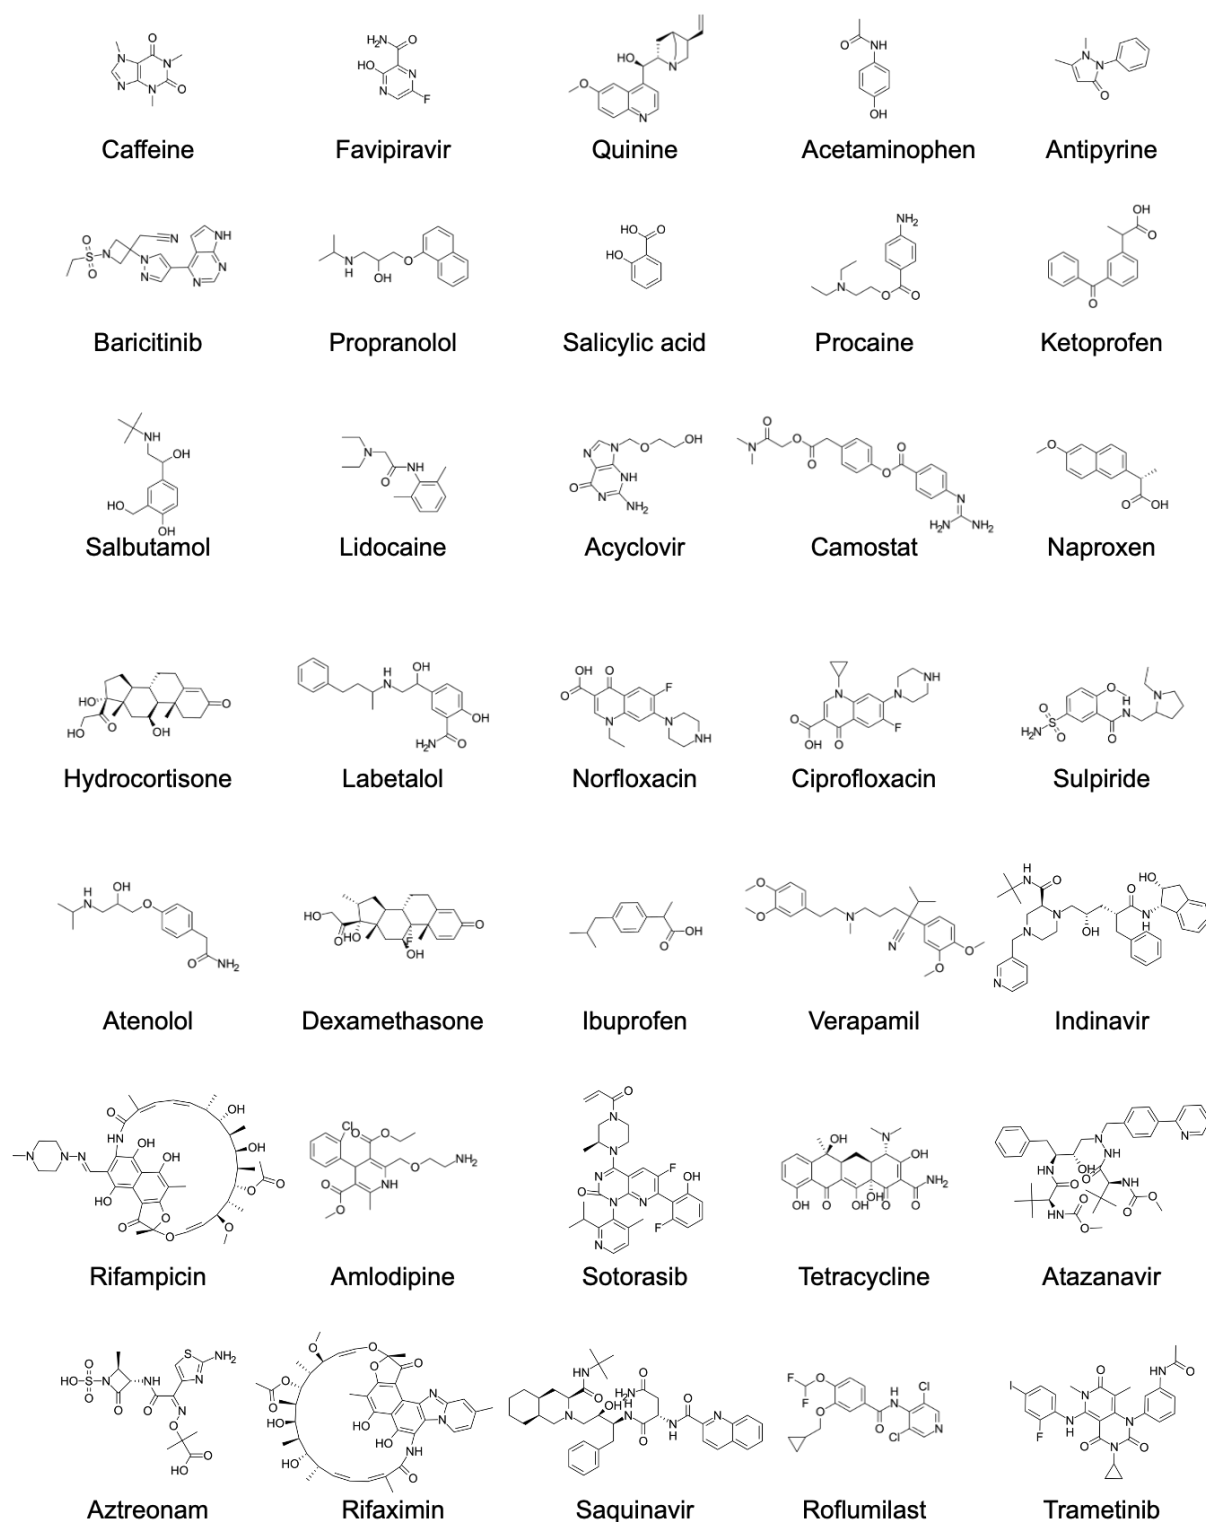

Figure S1. Molecular structures of the 35 investigated drugs.

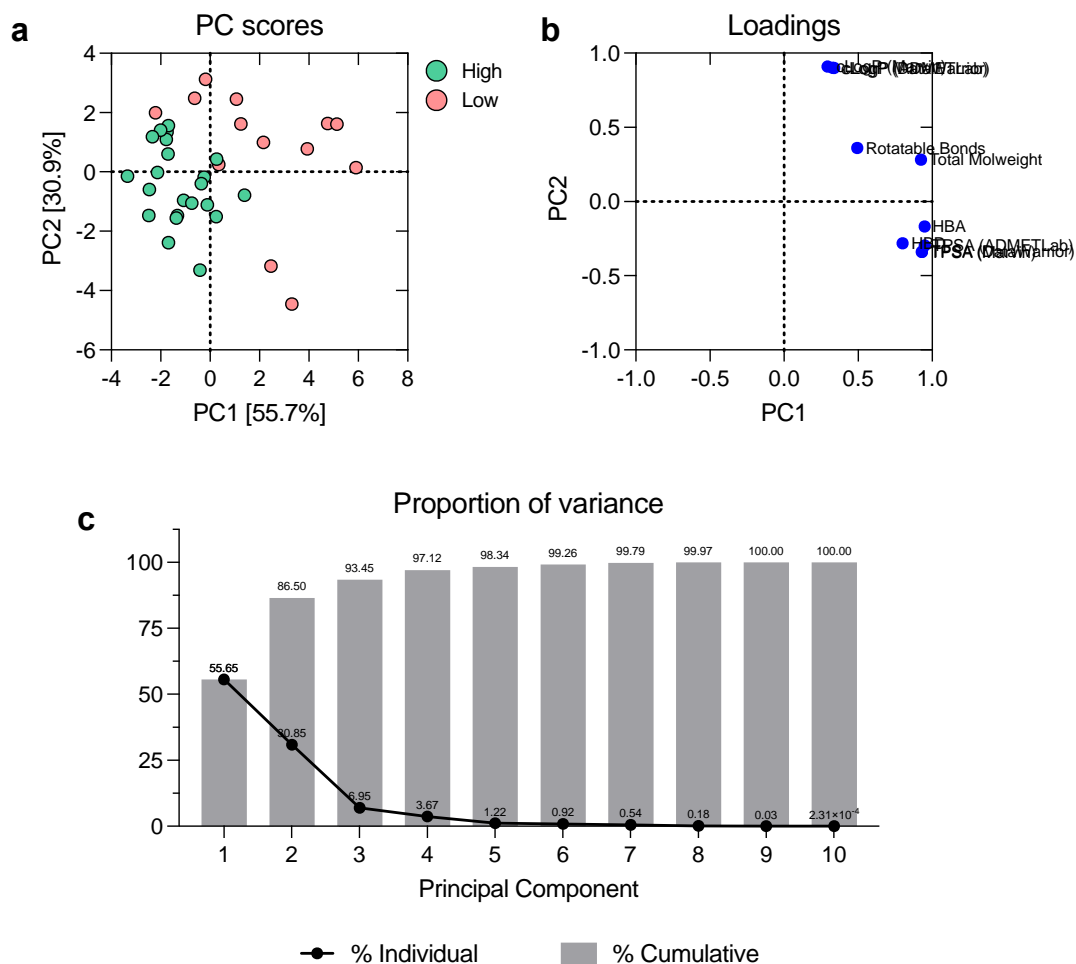

Figure S2. Principal component analysis. (a) Score plot of the observations along the two principal components (PC1, PC2). A binary classification color code (red, green) is used to point out the high- and low-permeable drugs. (b) Loading plot depicting clusters of variables. (c) Proportion of variance plot with the variance explained by each PC. PC1 and PC2 were selected based on parallel analysis.

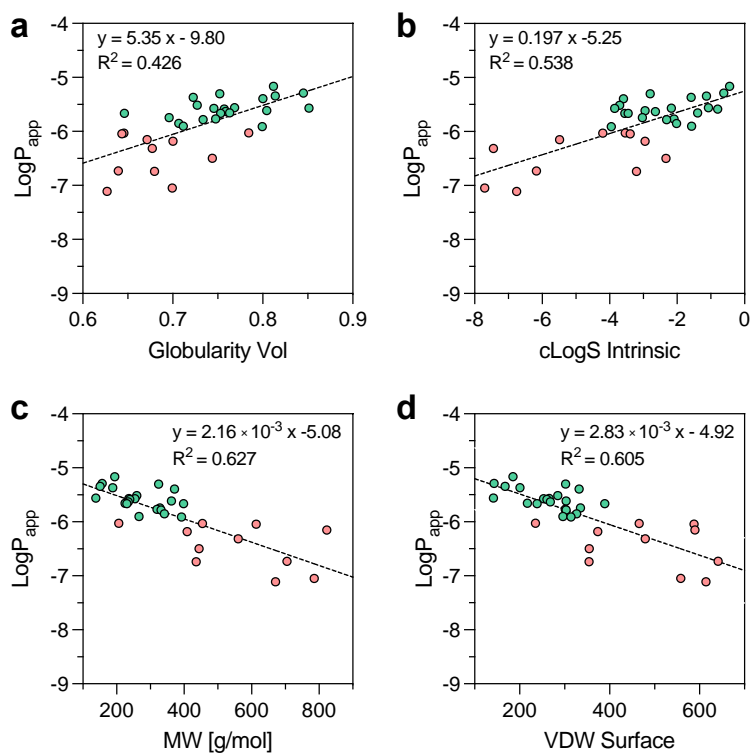

Figure S3. 2D plots of the logarithm of apparent permeability ( $P_{app}$ ) versus (a) globularity, (b) intrinsic solubility (cLogS), (c) molecular weight (MW), and (d) the Van der Waals Surface (VDW Surface). The gray area represents the prediction bands using a 90% confidence level.

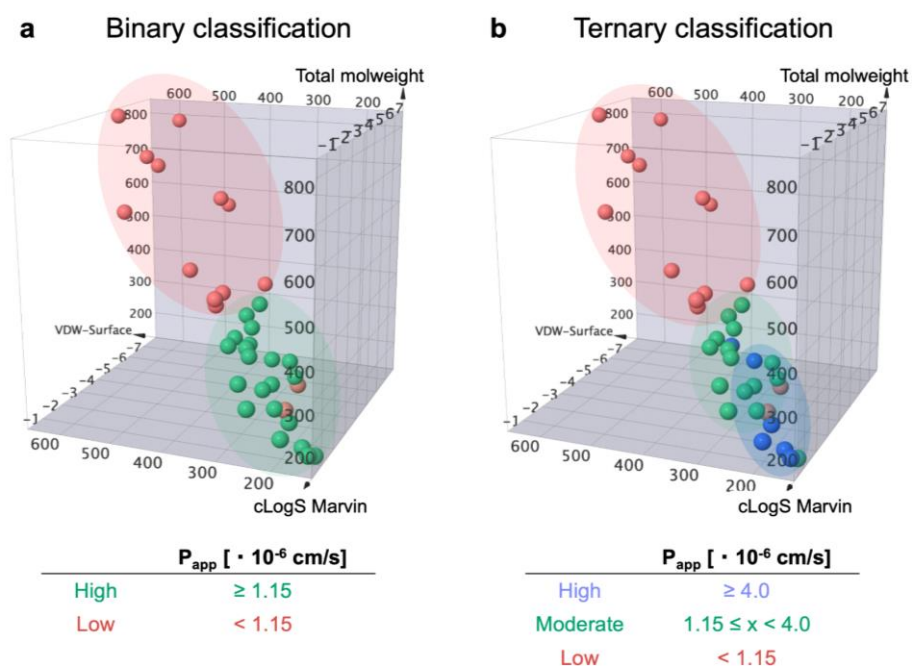

Figure S4: 3D plot depicting the chemical space of the dataset defined by cLogS, MW, and VDW Surface using a binary or a ternary classification system. The tables report the thresholds used to classify the dataset.

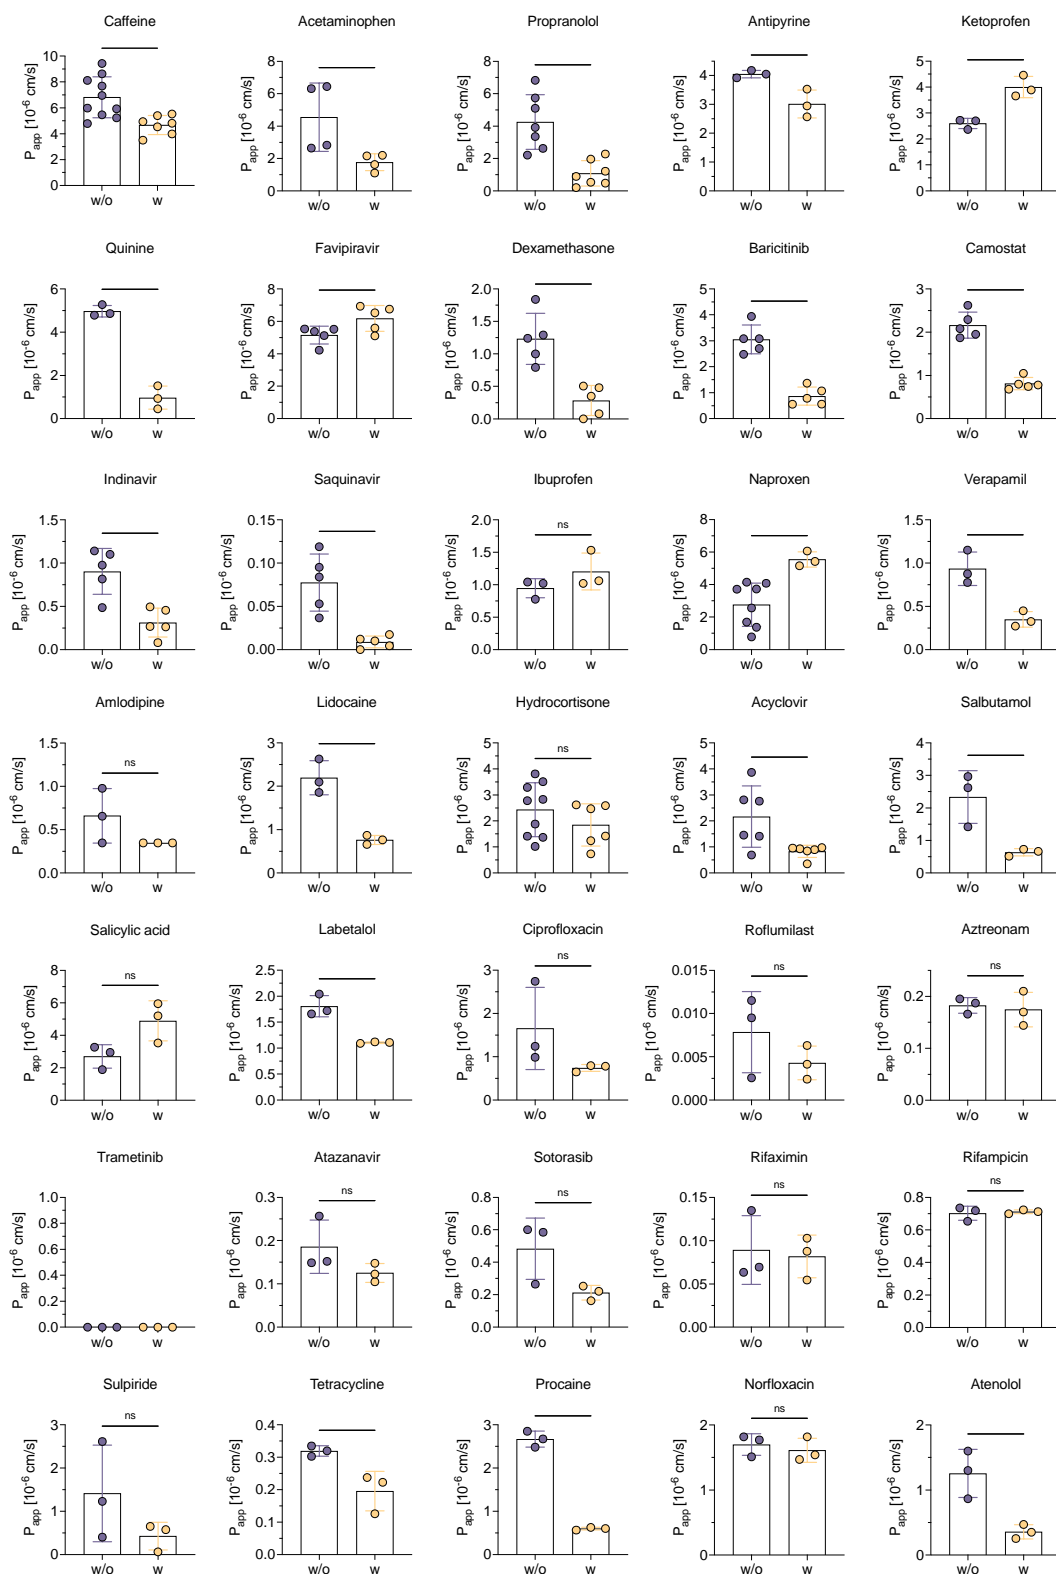

Figure S5. Comparison of the apparent permeability measured without (violet) and with (yellow) mucus. Statistical significance was calculated by applying the Student's  $t$  test; a  $p < 0.05$  was considered to be statistically significant and indicated with asterisks (i.e., \* $p < 0.05$ , \*\* $p < 0.01$ , \*\*\* $p < 0.001$ , \*\*\*\* $p < 0.0001$ ).

## Supplementary Tables

Table S1. Molecular descriptors dataset.

| Marvin, ChemAxon        | ADMETLab 2.0 | DataWarriors, Openmolecules |
|-------------------------|--------------|-----------------------------|
| Charge pH 7.4 (Nominal) | LogS         | Total Molweight             |
| Charge at pH 7.4        | LogD7.4      | cLogP                       |
| cLogP                   | LogP         | cLogS                       |
| cLogD7.4                | HIA          | H-Acceptors                 |
| cLogS (l)               | Caco-2       | H-Donors                    |
| cLogS (7.4)             | MDCK         | Total Surface Area          |
| Solubility mg/mL (l)    | Vol          | Relative PSA                |
| Solubility mg/mL pH7.4  | Dense        | Polar Surface Area          |
| logS mg/mL (l)          | TPSA         | Druglikeness                |
| logS mg/mL pH7.4        | nRot         | Shape Index                 |
| PSA 2D                  | nRing        | Molecular Flexibility       |
| VDW Surface Area 3D     | MaxRing      | Molecular Complexity        |
|                         | nHet         | Fragments                   |
|                         | fChar        | Non-H Atoms                 |
|                         | nRig         | Non-C/H Atoms               |
|                         | Flex         | Metal-Atoms                 |
|                         | nStereo      | Electronegative Atoms       |
|                         | QED          | Stereo Centers              |
|                         | Synth        | Rotatable Bonds             |
|                         | Fsp3         | Rings Closures              |
|                         | MCE-18       | Aromatic Atoms              |
|                         |              | sp3-Atoms                   |
|                         |              | Symmetric atoms             |
|                         |              | Small Rings                 |
|                         |              | Carbo-Rings                 |
|                         |              | Hetero-Rings                |
|                         |              | Saturated Rings             |
|                         |              | Non-Aromatic Rings          |
|                         |              | Aromatic Rings              |
|                         |              | Saturated Carbo-Rings       |
|                         |              | Non-Aromatic Carbo-Rings    |
|                         |              | Carbo-Aromatic Rings        |
|                         |              | Saturated Hetero-Rings      |
|                         |              | Non-Aromatic Hetero-Rings   |
|                         |              | Hetero-Aromatic Rings       |
|                         |              | Amides                      |
|                         |              | Amines                      |
|                         |              | Alkyl-Amines                |
|                         |              | Aromatic Amines             |
|                         |              | Aromatic Nitrogens          |
|                         |              | Basic Nitrogens             |
|                         |              | Acidic Oxygens              |
|                         |              | Stereo Configuration        |
|                         |              | Globularity SVD             |
|                         |              | Globularity Vol             |
|                         |              | VDW-Surface                 |
|                         |              | VDW-Volume                  |

Table S2. HPLC-ESI-MS analytical conditions of the investigated drugs.

| ID | Drug           | Mobile phase                        | Polarity | Paren ion | Fragment ion | CE (V) |
|----|----------------|-------------------------------------|----------|-----------|--------------|--------|
| 1  | Caffeine       | H <sub>2</sub> O, 0.1% FA - ACN     | +        | 195.1     | 137.8        | -20.0  |
| 2  | Acetaminophen  |                                     | +        | 152.0     | 109.8        | -13.0  |
| 3  | Propranolol    |                                     | +        | 259.9     | 116.1        | -11.5  |
| 4  | Antipyrine     |                                     | +        | 189.0     | 76.9         | -32.5  |
| 5  | Ketoprofen     |                                     | +        | 255.1     | 104.7        | -22.0  |
| 6  | Quinine        |                                     | +        | 325.0     | 307.0        | -18.0  |
| 7  | Favipiravir    |                                     | -        | 155.5     | 112.7        | 13.0   |
| 8  | Dexamethasone  |                                     | +        | 372.8     | 237.1        | -20.0  |
| 9  | Baricitinib    |                                     | +        | 371.7     | 186.2        | -34.5  |
| 10 | Camostat       |                                     | +        | 399.0     | 296.0        | -18.0  |
| 11 | Indinavir      |                                     | +        | 614.2     | 421.1        | -26.5  |
| 12 | Saquinavir     |                                     | +        | 671.3     | 570.2        | -25.0  |
| 15 | Verapamil      |                                     | +        | 455.4     | 164.9        | -21.0  |
| 16 | Amlodipine     |                                     | +        | 409.2     | 237.6        | -14.5  |
| 17 | Lidocaine      |                                     | +        | 235.1     | 85.6         | -14.0  |
| 18 | Hydrocortisone |                                     | +        | 363.2     | 120.9        | -25.5  |
| 19 | Acyclovir      |                                     | +        | 225.9     | 152.0        | -14.0  |
| 20 | Salbutamol     |                                     | +        | 240.0     | 148.0        | -18.5  |
| 22 | Labetalol      |                                     | +        | 329.0     | 162.0        | -24.5  |
| 23 | Ciprofloxacin  |                                     | +        | 331.0     | 245.0        | -20.5  |
| 24 | Roflumilast    |                                     | +        | 402.8     | 187.0        | -26.5  |
| 25 | Aztreonam      |                                     | +        | 436.0     | 313.1        | -15.0  |
| 26 | Trametinib     |                                     | +        | 616.4     | 253.9        | -29.0  |
| 27 | Atazanavir     |                                     | +        | 705.8     | 168.0        | -39.5  |
| 28 | Sotorasib      |                                     | +        | 561.4     | 317.0        | -31.5  |
| 29 | Rifaximin      |                                     | +        | 786.8     | 754.6        | -14.5  |
| 30 | Rifampicin     |                                     | +        | 823.6     | 790.9        | -13.0  |
| 31 | Sulpiride      |                                     | +        | 342.1     | 111.9        | -22.5  |
| 32 | Tetracycline   |                                     | +        | 445.2     | 409.2        | -14.5  |
| 33 | Procaine       |                                     | +        | 237.2     | 99.8         | -13.0  |
| 34 | Norfloxacin    |                                     | +        | 320.0     | 276.0        | -14.5  |
| 35 | Atenolol       |                                     | +        | 267.1     | 144.9        | -24.0  |
| 13 | Ibuprofen      | Ammonium acetate 5 mM, pH 6.5 - ACN | -        | 205.0     | 160.5        | 5.5    |
| 14 | Naproxen       |                                     | -        | 229.0     | 184.6        | 5.5    |
| 21 | Salicylic acid |                                     | -        | 136.8     | 92.6         | 11.0   |

Table S3. Compliance of the dataset to Lipinski's rule of 5 (Ro5). The partition coefficient (cLogP) is the average of cLogP calculated with MarvinSketch, ADMETLab 2.0, and DataWarrior.

| ID | Compound       | Total Molweight<br>[g/mol] | cLogP | H-Acceptors | H-Donors | Rule 1 | Rule 2 | Rule 3 | Rule 4 | Number of<br>rules observed |
|----|----------------|----------------------------|-------|-------------|----------|--------|--------|--------|--------|-----------------------------|
| 1  | Caffeine       | 194.19                     | -0.23 | 6           | 0        | yes    | yes    | yes    | yes    | 4                           |
| 2  | Acetaminophen  | 151.16                     | 0.85  | 3           | 2        | yes    | yes    | yes    | yes    | 4                           |
| 3  | Propranolol    | 259.35                     | 2.75  | 3           | 2        | yes    | yes    | yes    | yes    | 4                           |
| 4  | Antipyrine     | 188.23                     | 0.79  | 3           | 0        | yes    | yes    | yes    | yes    | 4                           |
| 5  | Ketoprofen     | 254.28                     | 3.17  | 3           | 1        | yes    | yes    | yes    | yes    | 4                           |
| 6  | Quinine        | 324.42                     | 2.44  | 4           | 1        | yes    | yes    | yes    | yes    | 4                           |
| 7  | Favipiravir    | 157.10                     | -0.82 | 5           | 2        | yes    | yes    | yes    | yes    | 4                           |
| 8  | Dexamethasone  | 392.47                     | 1.82  | 5           | 3        | yes    | yes    | yes    | yes    | 4                           |
| 9  | Baricitinib    | 371.42                     | 0.38  | 9           | 1        | yes    | yes    | yes    | yes    | 4                           |
| 10 | Camostat       | 398.42                     | 1.27  | 9           | 3        | yes    | yes    | yes    | yes    | 4                           |
| 11 | Indinavir      | 613.80                     | 2.97  | 9           | 4        | yes    | yes    | no     | yes    | 3                           |
| 12 | Saquinavir     | 670.85                     | 3.40  | 11          | 5        | yes    | no     | no     | yes    | 2                           |
| 13 | Ibuprofen      | 206.28                     | 3.51  | 2           | 1        | yes    | yes    | yes    | yes    | 4                           |
| 14 | Naproxen       | 230.26                     | 2.98  | 3           | 1        | yes    | yes    | yes    | yes    | 4                           |
| 15 | Verapamil      | 454.61                     | 4.43  | 6           | 0        | yes    | yes    | yes    | yes    | 4                           |
| 16 | Amlodipine     | 408.88                     | 1.86  | 7           | 2        | yes    | yes    | yes    | yes    | 4                           |
| 17 | Lidocaine      | 234.34                     | 2.37  | 3           | 1        | yes    | yes    | yes    | yes    | 4                           |
| 18 | Hydrocortisone | 362.46                     | 1.59  | 5           | 3        | yes    | yes    | yes    | yes    | 4                           |
| 19 | Acyclovir      | 225.21                     | -1.68 | 8           | 3        | yes    | yes    | yes    | yes    | 4                           |
| 20 | Salbutamol     | 239.31                     | 0.61  | 4           | 4        | yes    | yes    | yes    | yes    | 4                           |
| 21 | Salicylic acid | 138.12                     | 1.67  | 3           | 2        | yes    | yes    | yes    | yes    | 4                           |
| 22 | Labetalol      | 328.41                     | 2.37  | 5           | 4        | yes    | yes    | yes    | yes    | 4                           |
| 23 | Ciprofloxacin  | 331.35                     | -0.26 | 6           | 2        | yes    | yes    | yes    | yes    | 4                           |
| 24 | Roflumilast    | 403.21                     | 4.14  | 5           | 1        | yes    | yes    | yes    | yes    | 4                           |
| 25 | Aztreonam      | 435.44                     | -1.81 | 13          | 4        | yes    | no     | yes    | yes    | 3                           |
| 26 | Trametinib     | 615.40                     | 3.79  | 9           | 2        | yes    | yes    | no     | yes    | 3                           |
| 27 | Atazanavir     | 704.87                     | 4.21  | 13          | 5        | yes    | no     | no     | yes    | 2                           |
| 28 | Sotorasib      | 560.60                     | 4.82  | 9           | 1        | yes    | yes    | no     | yes    | 3                           |
| 29 | Rifaximin      | 785.89                     | 5.48  | 14          | 5        | yes    | no     | no     | no     | 1                           |
| 30 | Rifampicin     | 822.95                     | 3.95  | 16          | 6        | no     | no     | no     | yes    | 1                           |
| 31 | Sulpiride      | 341.43                     | 0.57  | 7           | 2        | yes    | yes    | yes    | yes    | 4                           |
| 32 | Tetracycline   | 444.44                     | -0.37 | 10          | 6        | no     | yes    | yes    | yes    | 3                           |
| 33 | Procaine       | 236.31                     | 1.86  | 4           | 1        | yes    | yes    | yes    | yes    | 4                           |
| 34 | Norfloxacin    | 319.34                     | -0.35 | 6           | 2        | yes    | yes    | yes    | yes    | 4                           |
| 35 | Atenolol       | 266.34                     | 0.34  | 5           | 3        | yes    | yes    | yes    | yes    | 4                           |

Table S4. Compliance of the dataset to Veber's rule.

| ID | Compound       | Rotable bonds | TPSA   | Rule 1 | Rule 2 | Number of rules observed |
|----|----------------|---------------|--------|--------|--------|--------------------------|
| 1  | Caffeine       | 0             | 58.44  | yes    | yes    | 2                        |
| 2  | Acetaminophen  | 1             | 49.33  | yes    | yes    | 2                        |
| 3  | Propranolol    | 6             | 41.49  | yes    | yes    | 2                        |
| 4  | Antipyrine     | 1             | 23.55  | yes    | yes    | 2                        |
| 5  | Ketoprofen     | 4             | 54.37  | yes    | yes    | 2                        |
| 6  | Quinine        | 4             | 45.59  | yes    | yes    | 2                        |
| 7  | Favipiravir    | 1             | 89.1   | yes    | yes    | 2                        |
| 8  | Dexamethasone  | 2             | 94.83  | yes    | yes    | 2                        |
| 9  | Baricitinib    | 4             | 128.94 | yes    | yes    | 2                        |
| 10 | Camostat       | 9             | 134.81 | yes    | yes    | 2                        |
| 11 | Indinavir      | 12            | 118.03 | no     | yes    | 1                        |
| 12 | Saquinavir     | 13            | 166.75 | no     | no     | 0                        |
| 13 | Ibuprofen      | 4             | 37.3   | yes    | yes    | 2                        |
| 14 | Naproxen       | 3             | 46.53  | yes    | yes    | 2                        |
| 15 | Verapamil      | 13            | 63.95  | no     | yes    | 1                        |
| 16 | Amlodipine     | 10            | 99.88  | yes    | yes    | 2                        |
| 17 | Lidocaine      | 5             | 32.34  | yes    | yes    | 2                        |
| 18 | Hydrocortisone | 2             | 94.83  | yes    | yes    | 2                        |
| 19 | Acyclovir      | 4             | 114.76 | yes    | yes    | 2                        |
| 20 | Salbutamol     | 5             | 72.72  | yes    | yes    | 2                        |
| 21 | Salicylic acid | 1             | 57.53  | yes    | yes    | 2                        |
| 22 | Labetalol      | 8             | 95.58  | yes    | yes    | 2                        |
| 23 | Ciprofloxacin  | 3             | 72.88  | yes    | yes    | 2                        |
| 24 | Roflumilast    | 7             | 60.45  | yes    | yes    | 2                        |
| 25 | Aztreonam      | 6             | 238.2  | yes    | no     | 1                        |
| 26 | Trametinib     | 5             | 102.06 | yes    | yes    | 2                        |
| 27 | Atazanavir     | 18            | 171.22 | no     | no     | 0                        |
| 28 | Sotorasib      | 4             | 102.23 | yes    | yes    | 2                        |
| 29 | Rifaximin      | 3             | 198.38 | yes    | no     | 1                        |
| 30 | Rifampicin     | 5             | 220.15 | yes    | no     | 1                        |
| 31 | Sulpiride      | 6             | 110.11 | yes    | yes    | 2                        |
| 32 | Tetracycline   | 2             | 181.62 | yes    | no     | 1                        |
| 33 | Procaine       | 7             | 55.56  | yes    | yes    | 2                        |
| 34 | Norfloxacin    | 3             | 72.88  | yes    | yes    | 2                        |
| 35 | Atenolol       | 8             | 84.58  | yes    | yes    | 2                        |

Table S5. Molecular descriptors that have the strongest correlation coefficient (Bravais-Pearson) with the apparent permeability ( $P_{app}$ ) .

| Molecular descriptor        | <i>r</i> (Bravais-Pearson) | Correlation |
|-----------------------------|----------------------------|-------------|
| Globularity Vol             | 0.672                      | Positive    |
| cLogS Marvin (I)            | 0.644                      | Positive    |
| logS mg/mL Marvin (I)       | 0.632                      | Positive    |
| Solubility mg/mL Marvin (I) | 0.618                      | Positive    |
| cLogS                       | 0.55                       | Positive    |
| cLogS Marvin (7.4)          | 0.527                      | Positive    |
| H-Donors                    | -0.504                     | Negative    |
| Rotatable Bonds             | -0.508                     | Negative    |
| nRot_ADMETlab               | -0.511                     | Negative    |
| sp3-Atoms                   | -0.545                     | Negative    |
| H-Acceptors                 | -0.547                     | Negative    |
| MCE-18_ADMETlab             | -0.55                      | Negative    |
| PSA 2D Marvin               | -0.554                     | Negative    |
| Polar Surface Area          | -0.555                     | Negative    |
| TPSA_ADMETlab               | -0.563                     | Negative    |
| Electronegative Atoms       | -0.596                     | Negative    |
| Non-C/H Atoms               | -0.596                     | Negative    |
| nHet_ADMETlab               | -0.596                     | Negative    |
| VDW Surface Area 3D Marvin  | -0.645                     | Negative    |
| VDW-Volume                  | -0.646                     | Negative    |
| Vol_ADMETlab                | -0.651                     | Negative    |
| Non-H Atoms                 | -0.652                     | Negative    |
| Total Surface Area          | -0.655                     | Negative    |
| VDW-Surface                 | -0.678                     | Negative    |
| Total Molweight             | -0.681                     | Negative    |

Table S6. Molecular descriptors that have the strongest correlation coefficient (Bravais-Pearson) with the apparent permeability ( $P_{app}$ ) measured in the presence of mucus.

| Molecular descriptor        | <i>r</i> (Bravais-Pearson) | Correlation |
|-----------------------------|----------------------------|-------------|
| Globularity Vol             | 0.691                      | Positive    |
| Solubility mg/mL Marvin (I) | 0.513                      | Positive    |
| nRot_ADMETlab               | -0.508                     | Negative    |
| Basic Nitrogens             | -0.509                     | Negative    |
| Rotatable Bonds             | -0.510                     | Negative    |
| sp3-Atoms                   | -0.534                     | Negative    |
| Non-H Atoms                 | -0.549                     | Negative    |
| Vol_ADMETlab                | -0.556                     | Negative    |
| VDW-Volume                  | -0.560                     | Negative    |
| Total Surface Area          | -0.564                     | Negative    |
| Total Molweight             | -0.569                     | Negative    |
| VDW Surface Area 3D Marvin  | -0.576                     | Negative    |
| VDW-Surface                 | -0.607                     | Negative    |
| Fsp3_ADMETlab               | -0.609                     | Negative    |
